# Supplementary material
Source: MDPI journal article supplement (https://www.mdpi.com/2071-1050/15/6/5417)
Supplement: s1 [file s1 › sustainability-2257327-supplementary.pdf]

## Supplementary Information

Additional illustrations to the article:

“Rainfall influences the patterns of diversity and species distribution in sandy beaches of the Amazon Coast”

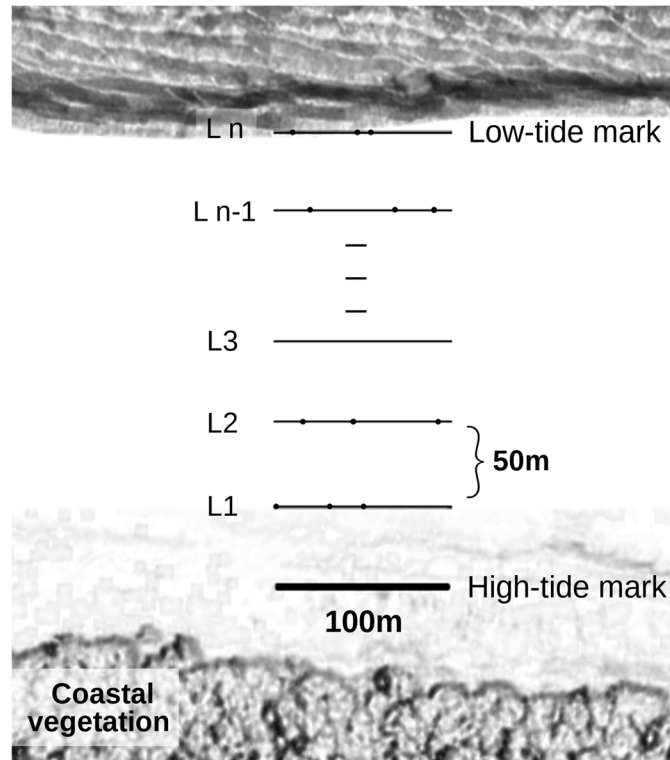

**Figure S1.** Schematic representation of the sampling design for macrobenthic assemblages at each beach. Random samples were taken using a 20-cm diameter core up to 25 cm deep. \*the total number of sampling levels varied among beaches: 10 at Goiabal, 28 at Sumaúma, and 40 at Nazaré.

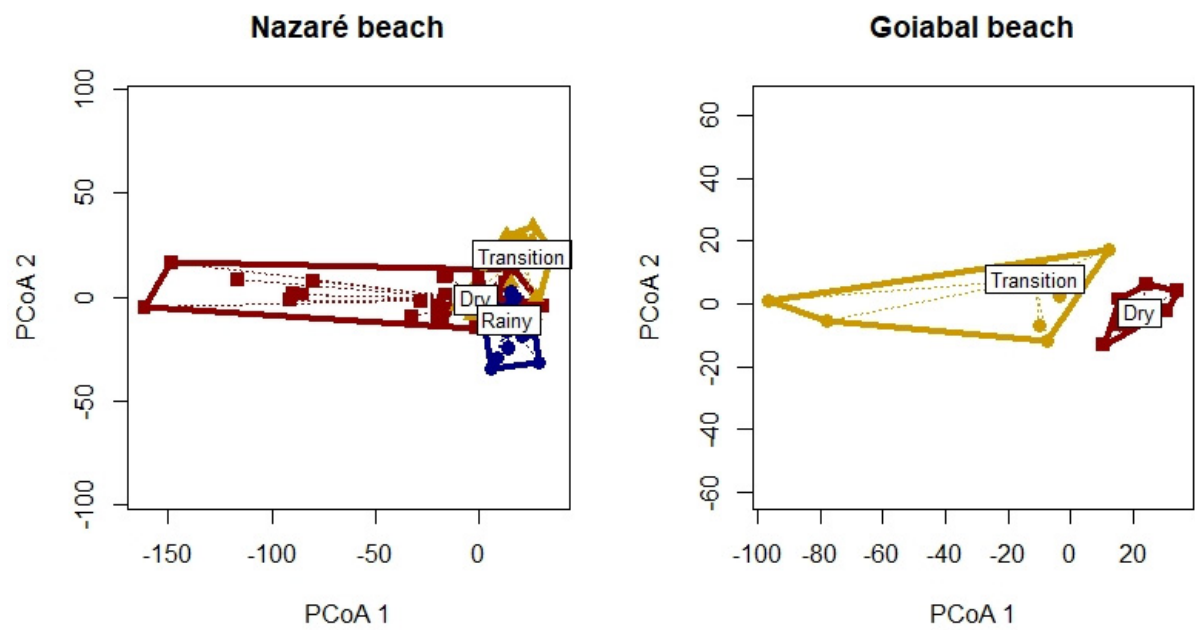

**Figure S2.** Habitat heterogeneity (multivariate dispersion of sampling stations on the Euclidean distance in environmental composition) among sampling periods at Nazaré and Goiabal beach. The label of each period corresponds to the position of the centroid.

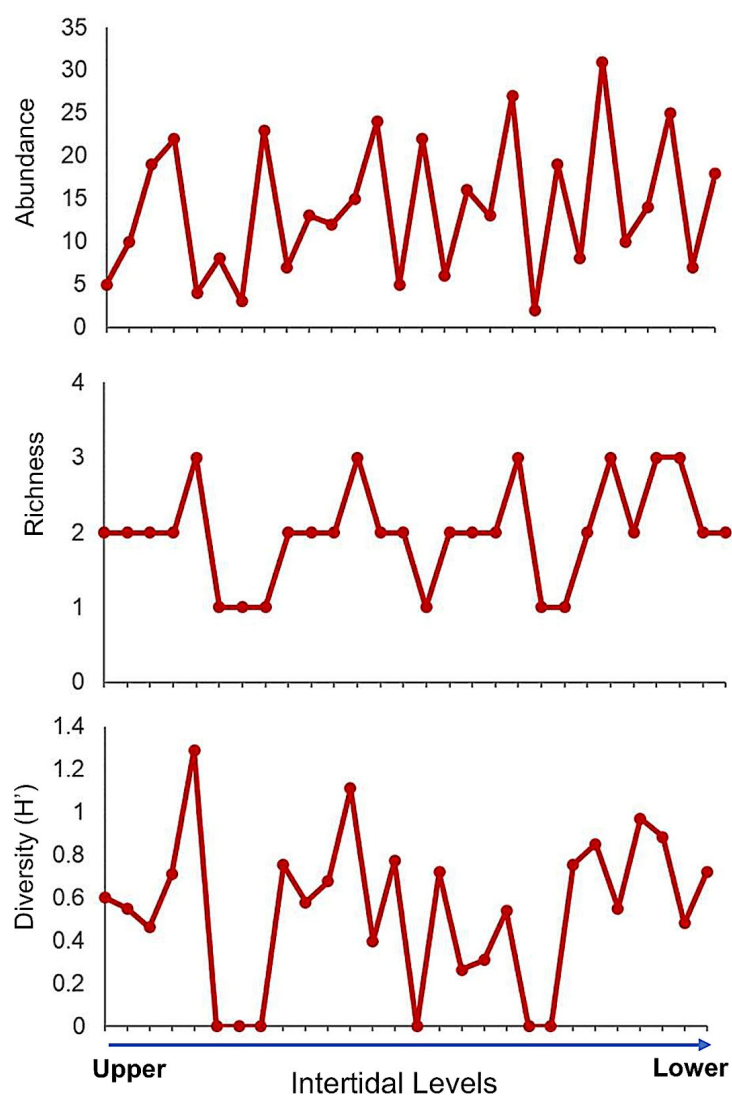

**Figure S3.** Distribution of assemblage descriptors along the intertidal levels at Sumaúma Beach, sampled only during dry period.

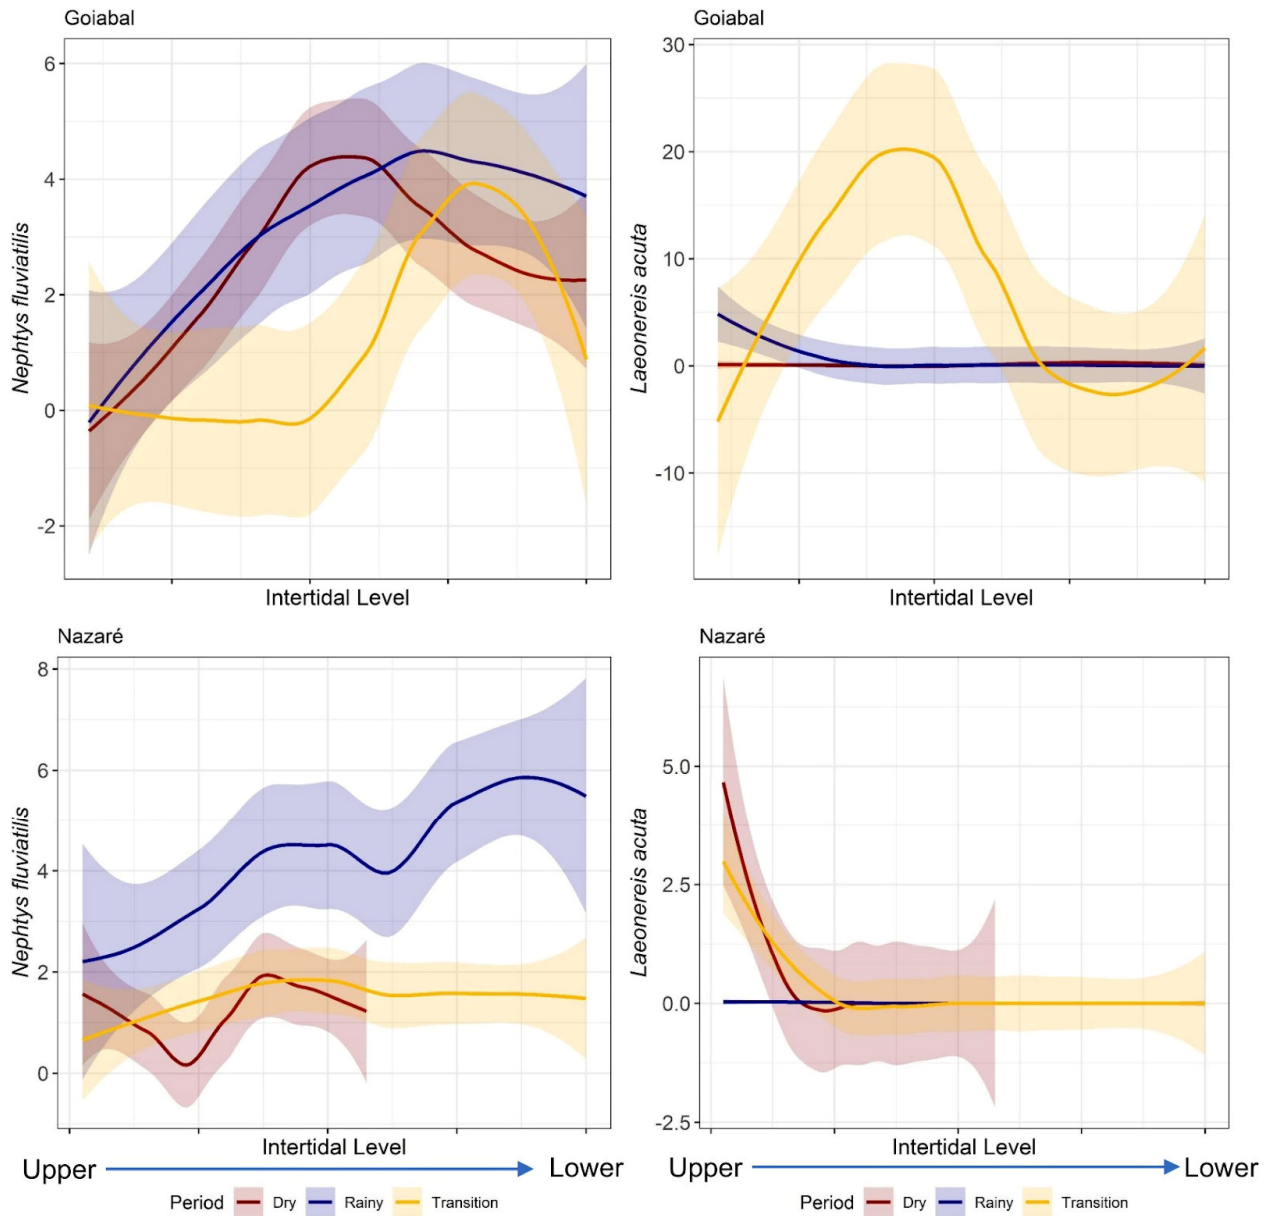

**Figure S4.** Distribution the abundance of the polychaetes *Nephtys fluviatilis* and *Laeonereis acuta* along the intertidal levels at Goiabal and Nazaré beaches during the three different sampling periods (dry, rainy, transition). Shaded areas represent smoothness curves (0.75 degrees of smoothing -  $\alpha$ ), estimated using the LOESS (locally estimated scatterplot smoothing) method.

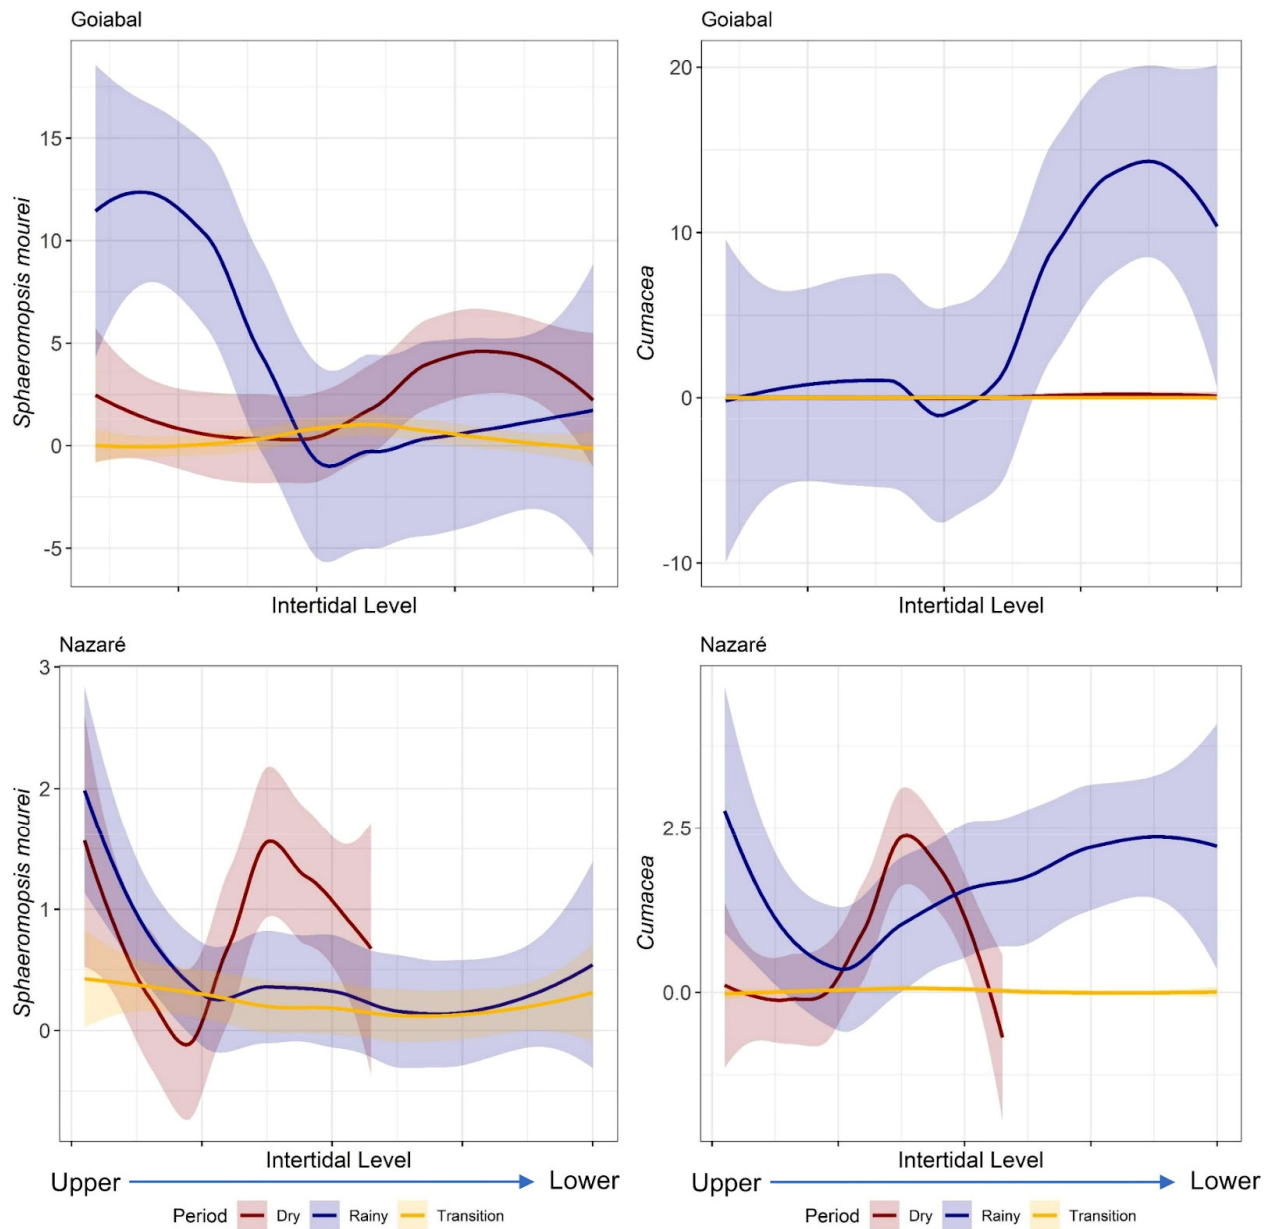

**Figure S5.** Distribution the abundance of the crustacean taxa *Sphaeromopsis mourei* and Cumacea along the intertidal levels at Goiabal and Nazaré beaches during the three different sampling periods (dry, rainy, transition). Shaded areas represent smoothness curves (0.75 degrees of smoothing -  $\alpha$ ), estimated using the LOESS (locally estimated scatterplot smoothing) method.

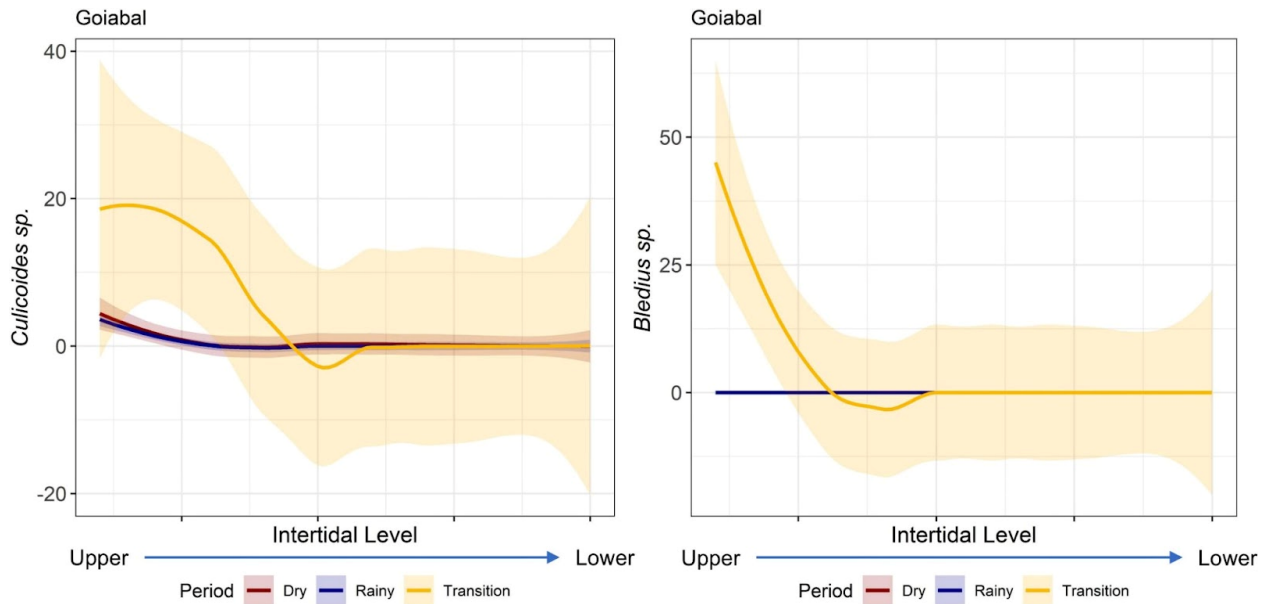

**Figure S6.** Distribution the abundance of the insects taxa *Culicoides sp.* and *Bledius sp.* along the intertidal levels at Goiabal and Nazaré beaches during the three different sampling periods (dry, rainy, transition). Shaded areas represent smoothness curves (0.75 degrees of smoothing -  $\alpha$ ), estimated using the LOESS (locally estimated scatterplot smoothing) method.
